# Supplementary material
Source: publisher figshare collection journal article supplement (https://gsajournals.figshare.com/ndownloader/files/13669544)
Supplement: Supplementary file 1 [file 13669544]

## Sheet: Sheet1
Table S5. The crossovers location distribution used for simulation based on data from D. melanogaster from Comeron et al. (2012). Smoothed rates are an average of observed rates across 5 neighboring windows.
chrom	window (500kb)	r	smoothed rate
2L	0	0	0
2L	1	1	1
2L	2	1.4	1.02
2L	3	1.5	1.32
2L	4	1.2	1.5
2L	5	1.5	1.68
2L	6	1.9	1.96
2L	7	2.3	2.24
2L	8	2.9	2.3
2L	9	2.6	2.14
2L	10	1.8	2.02
2L	11	1.1	1.7
2L	12	1.7	1.62
2L	13	1.3	1.62
2L	14	2.2	1.74
2L	15	1.8	1.74
2L	16	1.7	1.7
2L	17	1.7	1.68
2L	18	1.1	1.9
2L	19	2.1	1.88
2L	20	2.9	1.72
2L	21	1.6	1.7
2L	22	0.9	1.62
2L	23	1	1.44
2L	24	1.7	1.32
2L	25	2	1.44
2L	26	1	1.52
2L	27	1.5	1.36
2L	28	1.4	1.14
2L	29	0.9	1.02
2L	30	0.9	0.98
2L	31	0.4	1.02
2L	32	1.3	1.02
2L	33	1.6	0.9
2L	34	0.9	0.86
2L	35	0.3	0.66
2L	36	0.2	0.36
2L	37	0.3	0.22
2L	38	0.1	0.18
2L	39	0.2	0.22
2L	40	0.1	0.2
2L	41	0.4	0.18
2L	42	0.2	0.28
2L	43	0	0.26
2L	44	0.7	0.18
2L	45	0	0
2L	46	0	0
2R	0	0	0
2R	1	0	0
2R	2	0	0
2R	3	0	0
2R	4	0	0
2R	5	0	0
2R	6	0	0
2R	7	0	0.04
2R	8	0	0.06
2R	9	0.2	0.1
2R	10	0.1	0.1
2R	11	0.2	0.16
2R	12	0	0.22
2R	13	0.3	0.32
2R	14	0.5	0.36
2R	15	0.6	0.44
2R	16	0.4	0.6
2R	17	0.4	0.7
2R	18	1.1	0.8
2R	19	1	1.12
2R	20	1.1	1.3
2R	21	2	1.44
2R	22	1.3	1.7
2R	23	1.8	2.02
2R	24	2.3	1.82
2R	25	2.7	1.86
2R	26	1	1.86
2R	27	1.5	1.68
2R	28	1.8	1.4
2R	29	1.4	1.54
2R	30	1.3	1.78
2R	31	1.7	1.84
2R	32	2.7	1.84
2R	33	2.1	1.94
2R	34	1.4	1.98
2R	35	1.8	1.98
2R	36	1.9	1.98
2R	37	2.7	1.84
2R	38	2.1	1.82
2R	39	0.7	1.92
2R	40	1.7	1.78
2R	41	2.4	1.74
2R	42	2	1.94
2R	43	1.9	1.84
2R	44	1.7	1.66
2R	45	1.2	1.68
2R	46	1.5	1.48
2R	47	2.1	1.34
2R	48	0.9	1.1
2R	49	1	1
2R	50	0	0
3L	0	0.2	0.2
3L	1	0.8	0.8
3L	2	1	0.96
3L	3	1.4	1.18
3L	4	1.4	1.18
3L	5	1.3	1.28
3L	6	0.8	1.3
3L	7	1.5	1.34
3L	8	1.5	1.42
3L	9	1.6	1.46
3L	10	1.7	1.32
3L	11	1	1.2
3L	12	0.8	1.18
3L	13	0.9	1.08
3L	14	1.5	1.14
3L	15	1.2	1.26
3L	16	1.3	1.42
3L	17	1.4	1.4
3L	18	1.7	1.42
3L	19	1.4	1.66
3L	20	1.3	1.68
3L	21	2.5	1.48
3L	22	1.5	1.5
3L	23	0.7	1.62
3L	24	1.5	1.3
3L	25	1.9	1.14
3L	26	0.9	1.14
3L	27	0.7	0.92
3L	28	0.7	0.66
3L	29	0.4	0.68
3L	30	0.6	0.72
3L	31	1	0.7
3L	32	0.9	0.86
3L	33	0.6	0.84
3L	34	1.2	0.72
3L	35	0.5	0.64
3L	36	0.4	0.64
3L	37	0.5	0.54
3L	38	0.6	0.46
3L	39	0.7	0.42
3L	40	0.1	0.32
3L	41	0.2	0.24
3L	42	0	0.1
3L	43	0.2	0.08
3L	44	0	0.04
3L	45	0	0.06
3L	46	0	0.02
3L	47	0.1	0.02
3L	48	0	0.02
3L	49	0	0.02
3L	50	0	0
3L	51	0	0
3L	52	0	0
3L	53	0	0
3L	54	0	0
3L	55	0	0
3R	0	0	0
3R	1	0	0
3R	2	0	0
3R	3	0	0
3R	4	0	0
3R	5	0	0
3R	6	0	0
3R	7	0	0
3R	8	0	0
3R	9	0	0
3R	10	0	0
3R	11	0	0.02
3R	12	0	0.04
3R	13	0.1	0.12
3R	14	0.1	0.2
3R	15	0.4	0.34
3R	16	0.4	0.38
3R	17	0.7	0.46
3R	18	0.3	0.4
3R	19	0.5	0.42
3R	20	0.1	0.54
3R	21	0.5	0.58
3R	22	1.3	0.58
3R	23	0.5	0.74
3R	24	0.5	0.76
3R	25	0.9	0.7
3R	26	0.6	1.02
3R	27	1	1.06
3R	28	2.1	1.3
3R	29	0.7	1.38
3R	30	2.1	1.32
3R	31	1	0.98
3R	32	0.7	0.96
3R	33	0.4	0.76
3R	34	0.6	0.96
3R	35	1.1	1.3
3R	36	2	1.86
3R	37	2.4	2.04
3R	38	3.2	2.4
3R	39	1.5	2.14
3R	40	2.9	1.86
3R	41	0.7	1.52
3R	42	1	1.56
3R	43	1.5	1.32
3R	44	1.7	1.54
3R	45	1.7	1.62
3R	46	1.8	1.58
3R	47	1.4	1.54
3R	48	1.3	1.4
3R	49	1.5	1.26
3R	50	1	1.1
3R	51	1.1	1.1
3R	52	0.6	1.14
3R	53	1.3	1.24
3R	54	1.7	1.26
3R	55	1.5	1.32
3R	56	1.2	1.42
3R	57	0.9	1.28
3R	58	1.8	1.18
3R	59	1	1.04
3R	60	1	0.9
3R	61	0.5	0.54
3R	62	0.2	0.34
3R	63	0	0
3R	64	0	0
X	0	0	0
X	1	0	0
X	2	0.1	0.16
X	3	0.1	0.36
X	4	0.6	0.76
X	5	1	1.04
X	6	2	1.34
X	7	1.5	1.78
X	8	1.6	2.42
X	9	2.8	2.36
X	10	4.2	2.5
X	11	1.7	2.64
X	12	2.2	2.28
X	13	2.3	1.64
X	14	1	1.6
X	15	1	1.84
X	16	1.5	1.88
X	17	3.4	2.14
X	18	2.5	2.26
X	19	2.3	2.16
X	20	1.6	1.88
X	21	1	1.52
X	22	2	1.42
X	23	0.7	1.58
X	24	1.8	1.74
X	25	2.4	1.66
X	26	1.8	1.9
X	27	1.6	2.14
X	28	1.9	1.9
X	29	3	1.86
X	30	1.2	2.08
X	31	1.6	2.12
X	32	2.7	1.66
X	33	2.1	1.62
X	34	0.7	1.4
X	35	1	1.04
X	36	0.5	0.94
X	37	0.9	1.1
X	38	1.6	1.14
X	39	1.5	1.26
X	40	1.2	1.18
X	41	1.1	0.86
X	42	0.5	0.58
X	43	0	0.34
X	44	0.1	0.12
X	45	0	0
X	46	0	0
